# Supplementary figures and images for: Different MicroRNA Families Involved in Regulating High Temperature Stress Response during Cotton (Gossypium hirsutum L.) Anther Development
Source: MDPI journal article supplement (doi:10.3390/ijms21041280), 2020-02-14

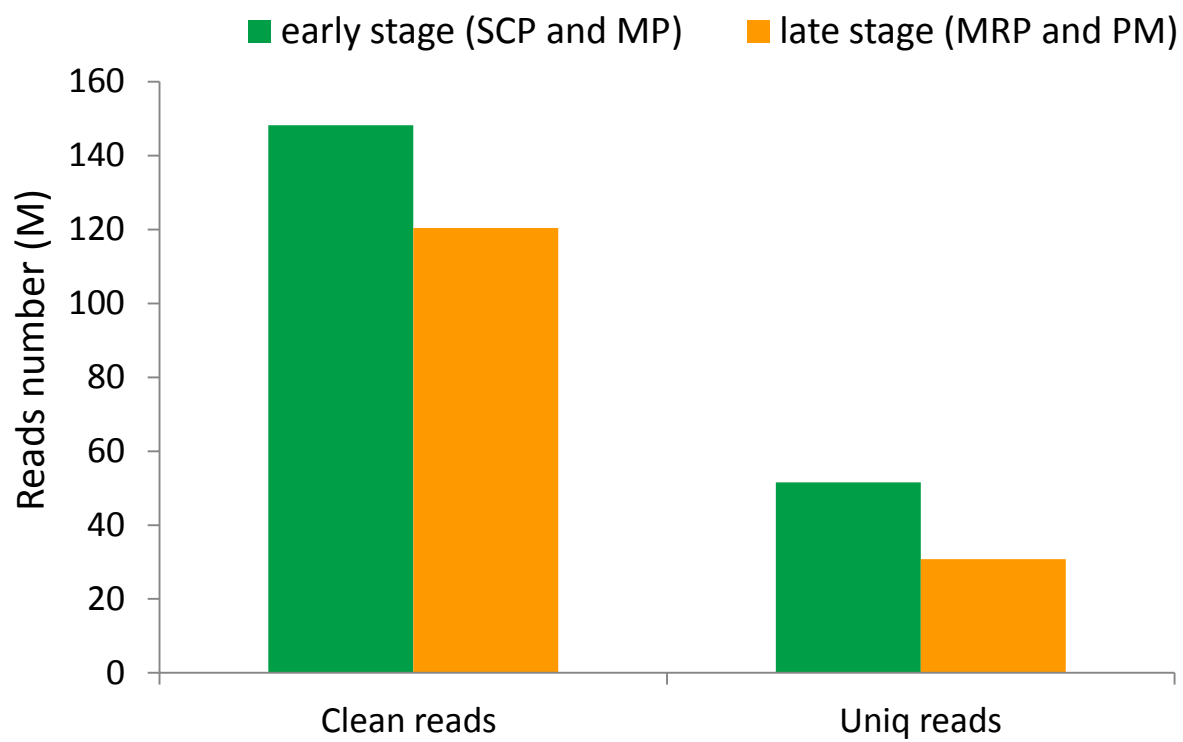

Supplement: s1 [file s1]

PCA 3D figure

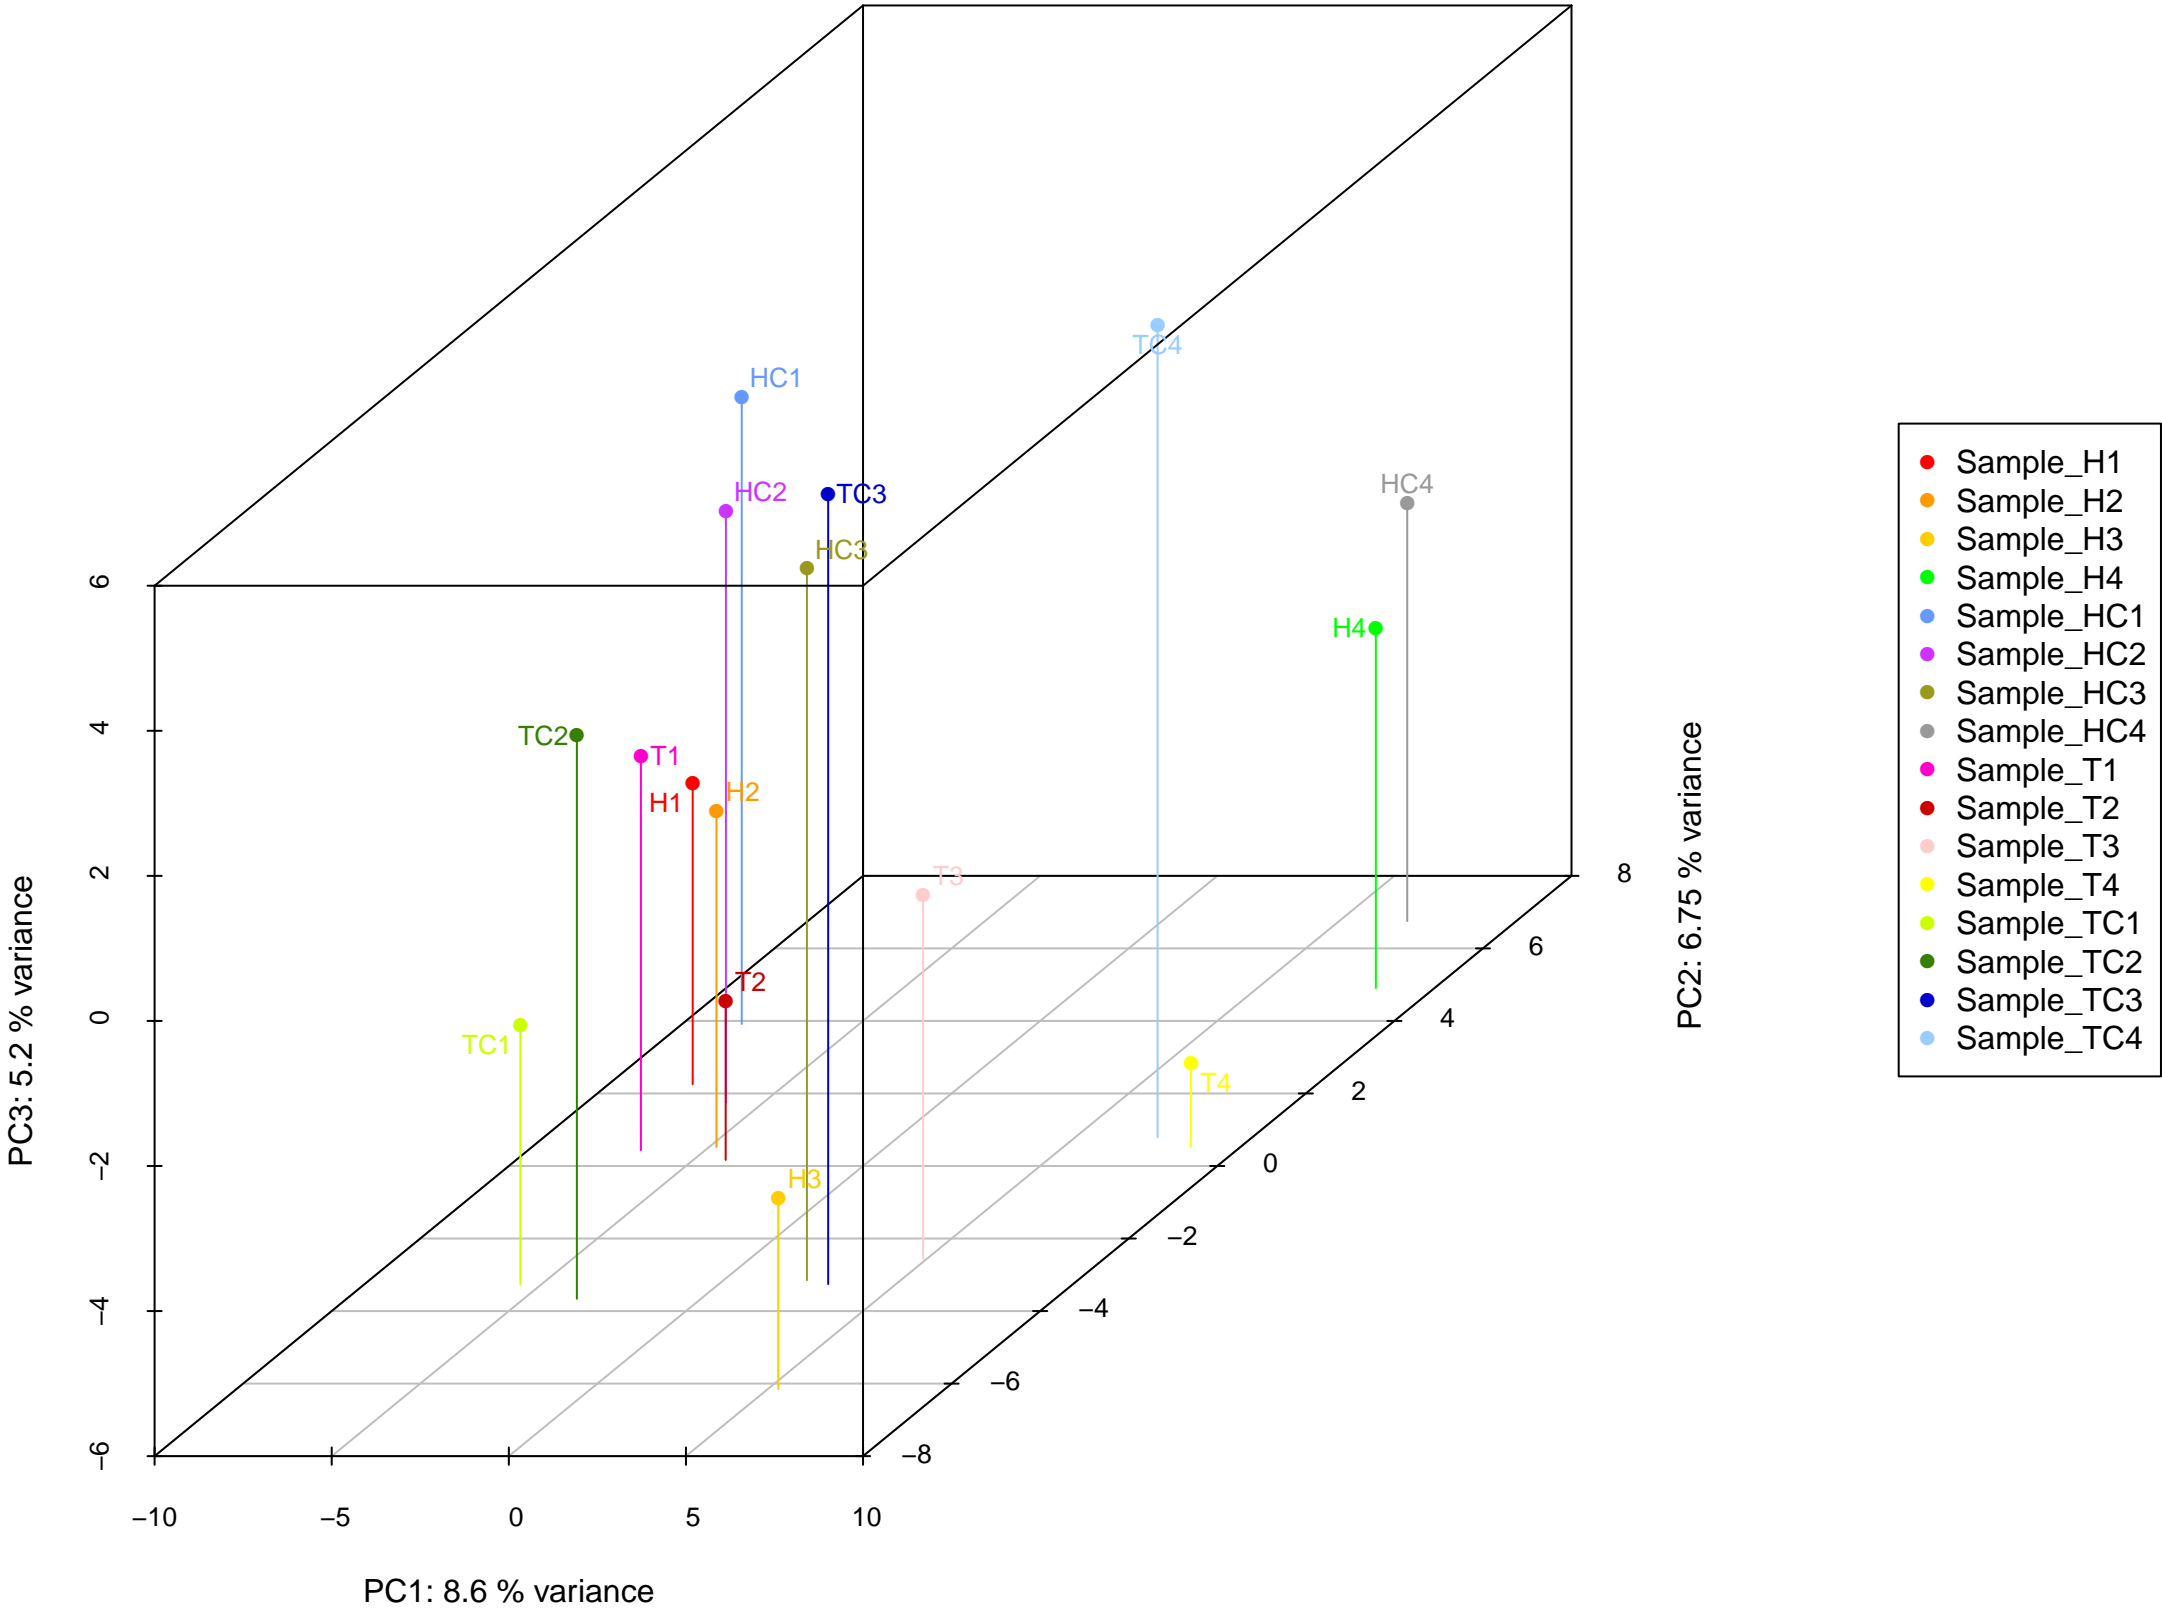

Supplement: s1 [file s1]

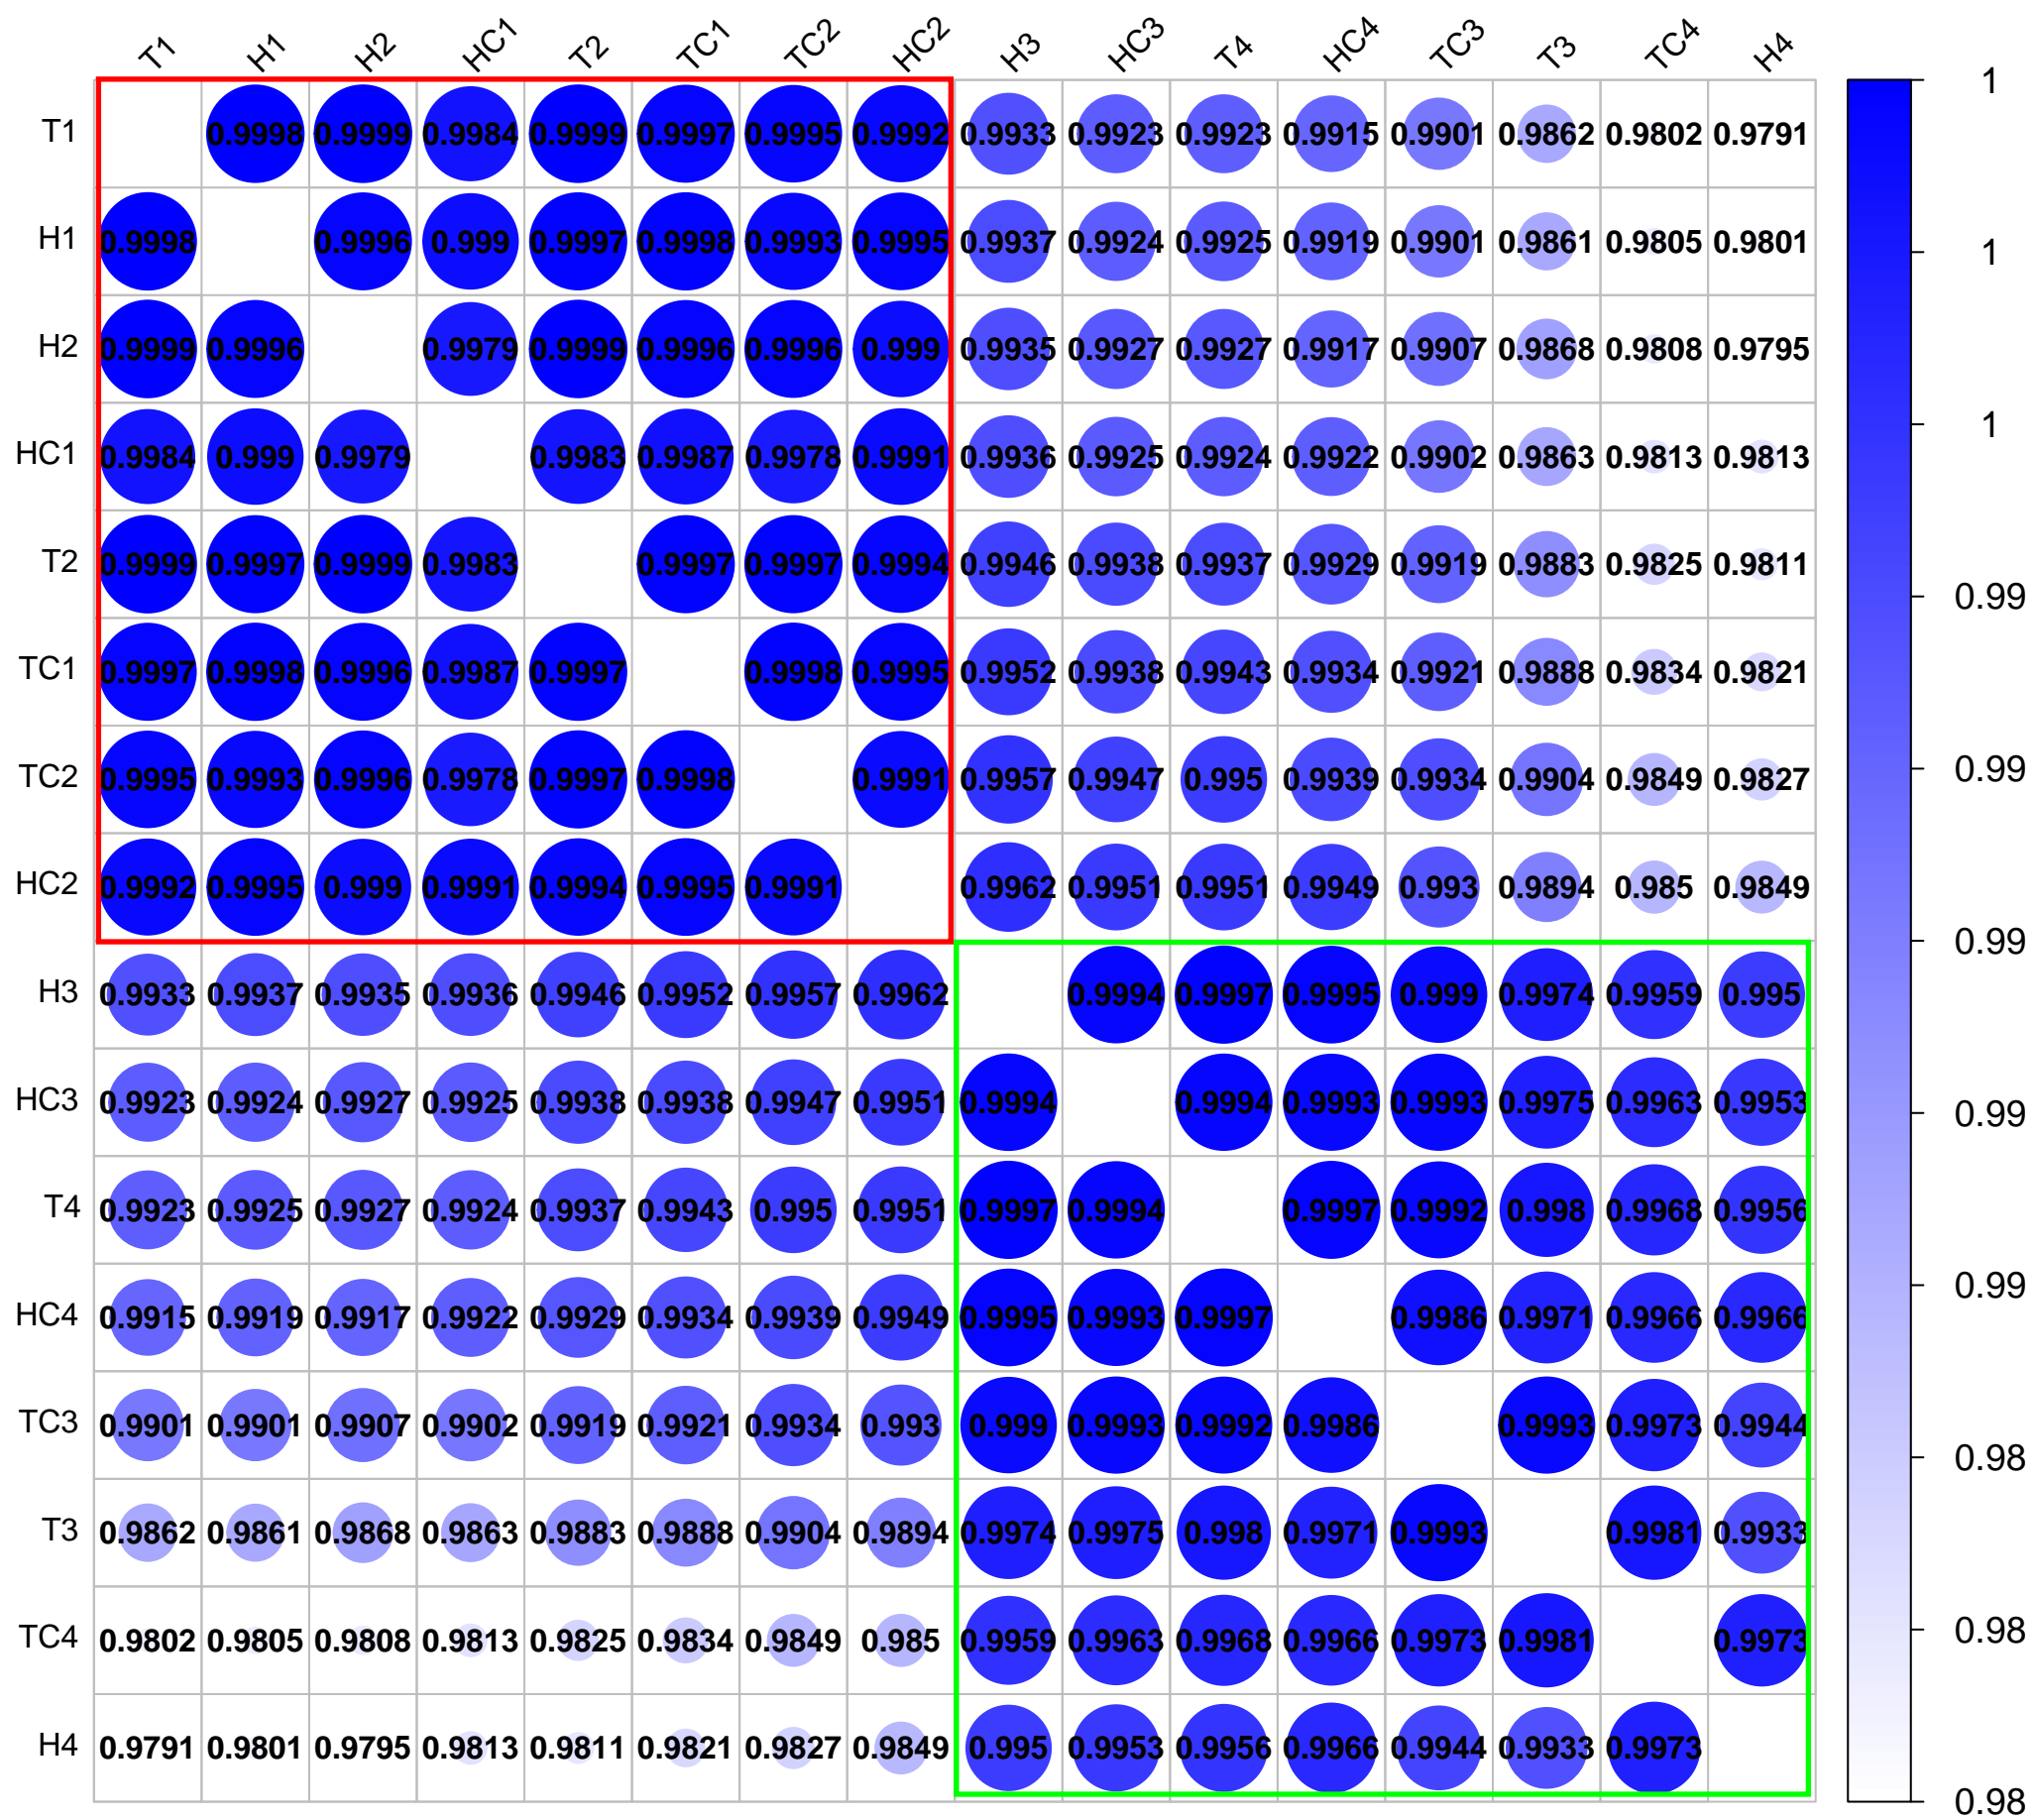

Supplement: s1 [file s1]

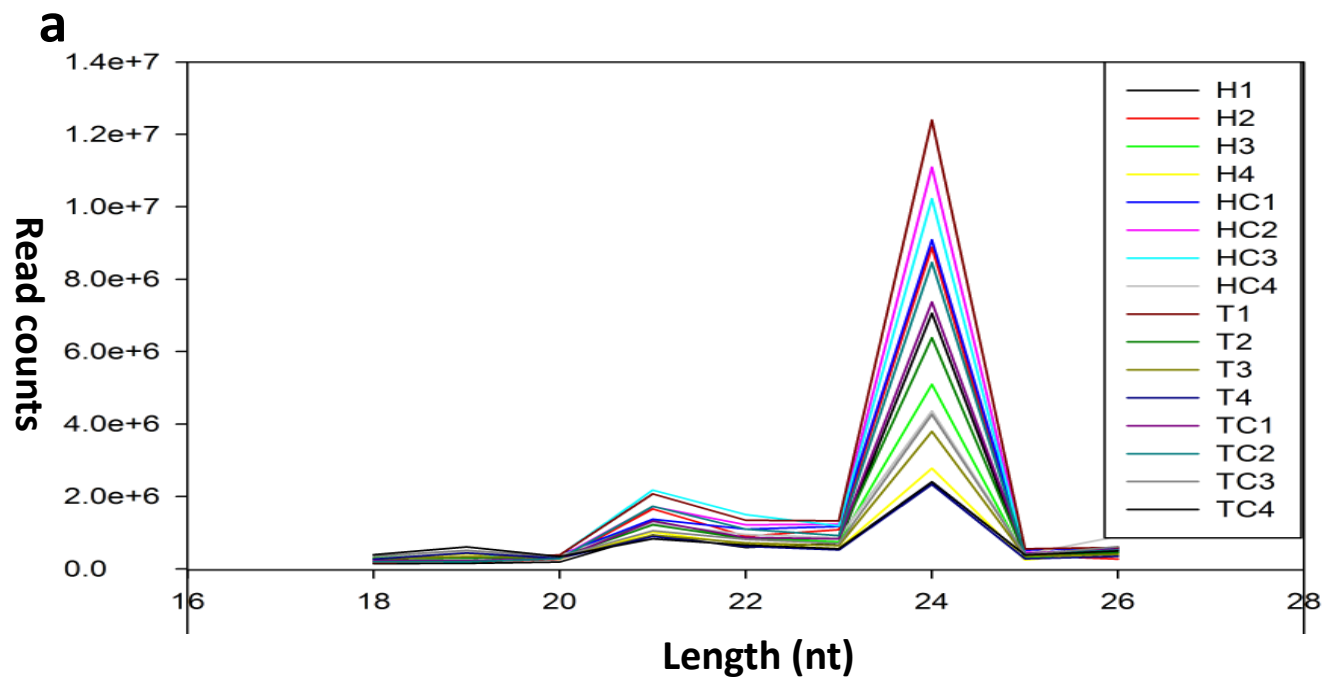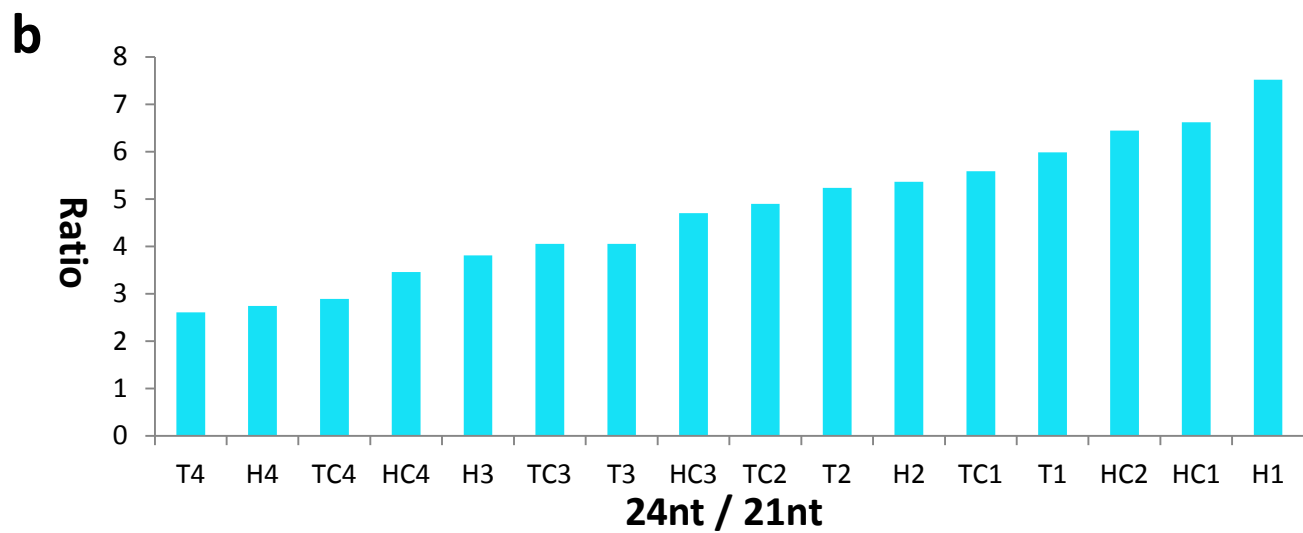

Supplement: s1 [file s1]

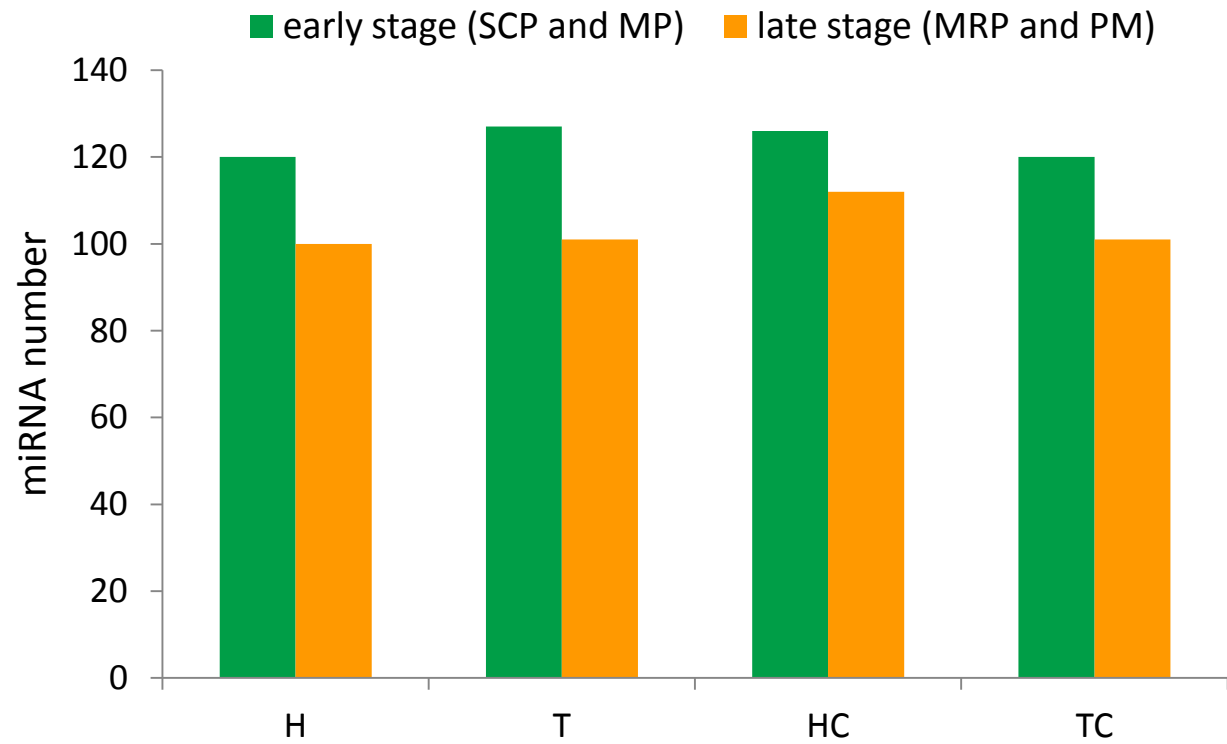

Supplement: s1 [file s1]

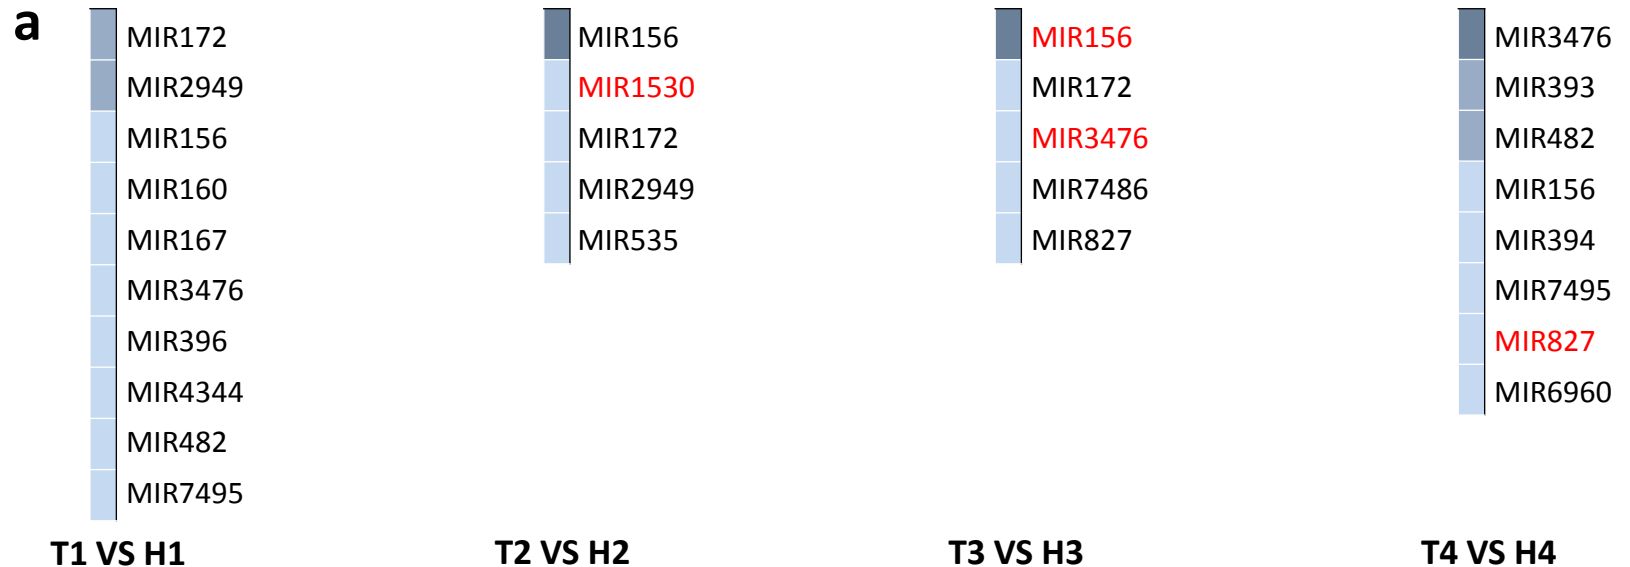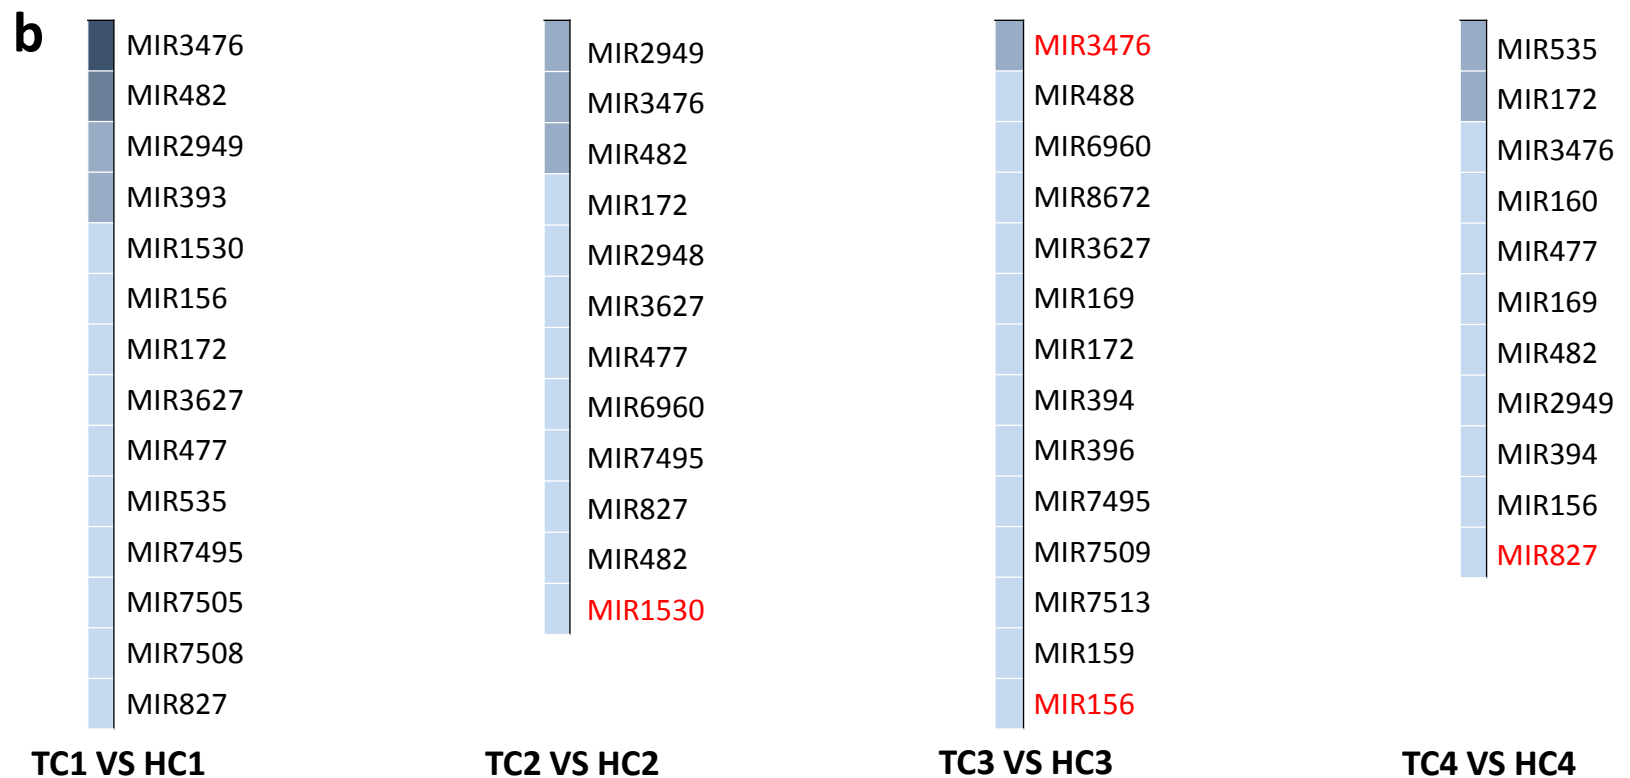

Supplement: s1 [file s1]

**HLY11 (H)**

**TS18 (T)**

**Normal temperature**

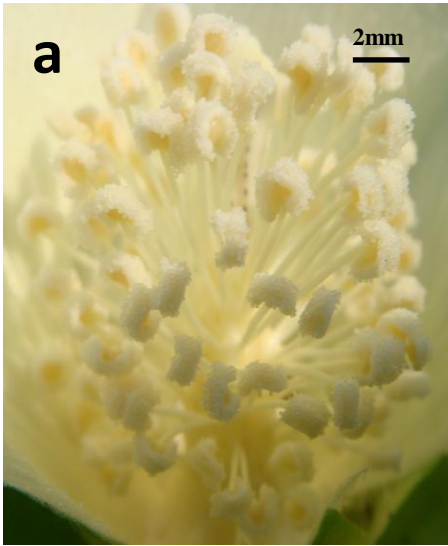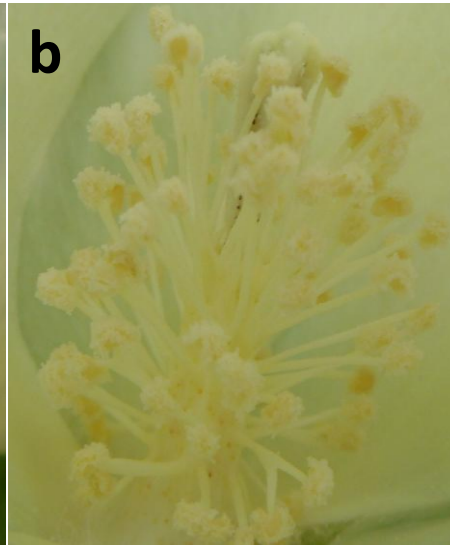

**High temperature**

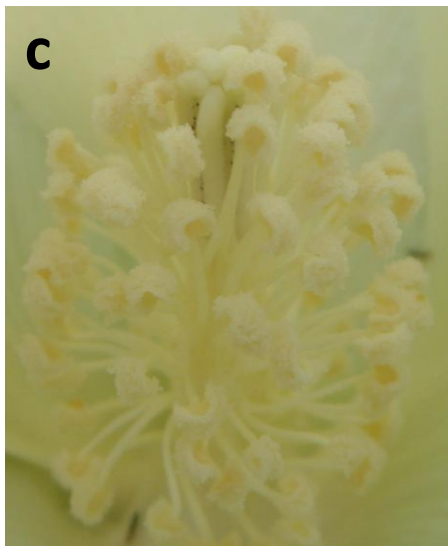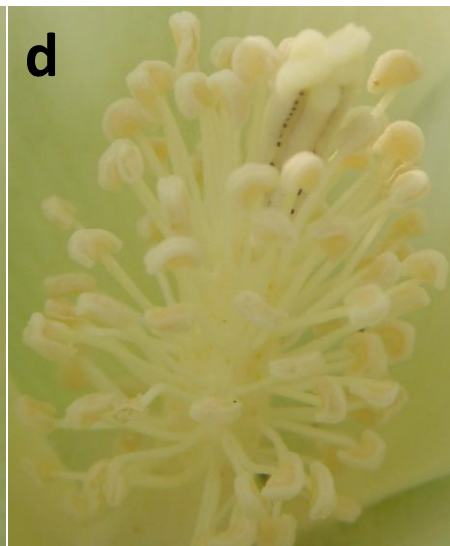

Supplement: s1 [file s1]
